# Supplementary material
Source: HighWire-hosted journal article supplement (https://erj.ersjournals.com/content/57/5/2003322)
Supplement: inline-supplementary-material-1 [file inline-supplementary-material-1.pdf]

# ONLINE SUPPLEMENT

## Obstructive sleep apnea and the progression of thoracic aortic aneurysm: a prospective cohort study

Thomas Gaisl<sup>1,2</sup>, Protazy Rejmer<sup>1</sup>, Maurice Roeder<sup>1</sup>, Patrick Baumgartner<sup>1</sup>,  
Noriane A. Sievi<sup>1</sup>, Sandra Siegfried<sup>3</sup>, Simon F. Stämpfli<sup>4</sup>, Robert Thurnheer<sup>5</sup>,  
John R. Stradling<sup>6</sup>, Felix C. Tanner<sup>7</sup>, Malcolm Kohler<sup>1</sup>

<sup>1</sup> Department of Pulmonology, University Hospital Zurich, Zurich, Switzerland

<sup>2</sup> Department of Epidemiology, Harvard T.H. Chan School of Public Health, Boston, MA

<sup>3</sup> Department of Biostatistics at Epidemiology, Biostatistics and Prevention Institute, University of Zurich, Zurich, Switzerland

<sup>4</sup> Department of Cardiology, Lucerne Cantonal Hospital, Lucerne, Switzerland

<sup>5</sup> Pulmonary Division, Muensterlingen Cantonal Hospital, Muensterlingen, Switzerland

<sup>6</sup> National Institute for Health Research (NIHR) Oxford Biomedical Research Centre, Oxford University Hospitals NHS Foundation Trust and University of Oxford, Oxford, United Kingdom

<sup>7</sup> Department of Cardiology, University Hospital Zurich, Zurich, Switzerland

### Index

|                                                                                                                                                                                                                                                                                                                                                                                                                                                                                                                                                                                                                              |   |
|------------------------------------------------------------------------------------------------------------------------------------------------------------------------------------------------------------------------------------------------------------------------------------------------------------------------------------------------------------------------------------------------------------------------------------------------------------------------------------------------------------------------------------------------------------------------------------------------------------------------------|---|
| <b>Table E1.</b> Patient characteristics of the per-protocol subgroup with complete data for annual aortic growth (n=160). .....                                                                                                                                                                                                                                                                                                                                                                                                                                                                                             | 2 |
| <b>Table E2.</b> Medication of the final TAA cohort at baseline (n=230). .....                                                                                                                                                                                                                                                                                                                                                                                                                                                                                                                                               | 3 |
| <b>Table E3.</b> Average TAA growth rates and blood pressure data by changes in overall number of antihypertensive drugs. ....                                                                                                                                                                                                                                                                                                                                                                                                                                                                                               | 4 |
| <b>Figure E1.</b> Absolute aortic sinus and ascending aorta measurements over three years of complete cases (n=160). .....                                                                                                                                                                                                                                                                                                                                                                                                                                                                                                   | 5 |
| <b>Table E4.</b> Normal linear regression model based on TAA expansion as the primary outcome (n=160) and controlling for baseline value and pre-defined cardiovascular confounders. Model 1 ( $\beta_{1 \text{ AHI}}$ ) was conducted according to the study protocol. Model 2-4 ( $\beta_{1 \text{ ODI}}$ / $\beta_{1 \text{ T90a}}$ / $\beta_{1 \text{ T90r}}$ ) are post-hoc analysis exploring potential association of alternative severity parameters of OSA. Model 5 ( $\beta_{1 \text{ AHI}}$ ) limited the analysis to subjects who did not effectively initiate CPAP-therapy during the course of the study. .... | 6 |
| <b>Table E5.</b> Average growth rates by AHI categories above and below 15 events per hour. ....                                                                                                                                                                                                                                                                                                                                                                                                                                                                                                                             | 7 |
| <b>Table E6.</b> Aortic sinus and ascending aorta dimensions measured by the same observer and corresponding absolute and relative measures of intraobserver variability cumulatively 1,920 measurements (160 subjects x 4 visits x 3 measurements). ....                                                                                                                                                                                                                                                                                                                                                                    | 8 |
| <b>Table E7.</b> Intraclass correlation coefficient using one-way ANOVA from 1,920 measurements at the aortic sinus (160 subjects x 4 visits x 3 measurements). ....                                                                                                                                                                                                                                                                                                                                                                                                                                                         | 8 |
| <b>Table E8.</b> Intraclass correlation coefficient using one-way ANOVA from 1,920 measurements at the ascending aorta (160 subjects x 4 visits x 3 measurements). ....                                                                                                                                                                                                                                                                                                                                                                                                                                                      | 9 |
| <b>Table E9.</b> Average aortic sinus and ascending aorta growth rates measured by three different observers in 480 growth rate calculations (160 subjects x 3 annual growth rates). ....                                                                                                                                                                                                                                                                                                                                                                                                                                    | 9 |

**Table E1.** Patient characteristics of the per-protocol subgroup with complete data for annual aortic growth (n=160).

| <b>Anthropometrics</b>                     |                 |                                 |
|--------------------------------------------|-----------------|---------------------------------|
| Age, years                                 |                 | 68.7 (60.0 to 73.6)             |
| Male, n (%)                                |                 | 132 (83%)                       |
| BMI, kg/m <sup>2</sup>                     |                 | 26.2 (24.4 to 29.1)             |
| Height, cm                                 |                 | 176 ± 7                         |
| Weight, kg                                 |                 | 83.9 ± 12.9                     |
| Body surface area, m <sup>2</sup>          |                 | 2.0 ± 0.2                       |
| Neck circumference, cm                     |                 | 39.5 ± 3.5                      |
| <b>Blood pressure data</b>                 |                 |                                 |
| Office<br>(average of three)               | Systolic, mmHg  | 129.3 (119.6 to 143.4)          |
|                                            | Diastolic, mmHg | 82.3 (75.6 to 89.5)             |
| Home<br>(7 day average)                    | Systolic, mmHg  | 125.4 (118.1 to 132.6)          |
|                                            | Diastolic, mmHg | 77.0 (70.4 to 83.7)             |
| <b>Comorbidities</b>                       |                 |                                 |
| Active / Ex- / Never-Smokers, n (%)        |                 | 18 (11%) / 75 (47 %) / 67 (42%) |
| History of hypertension, n (%)             |                 | 116 (73%)                       |
| History of diabetes mellitus type 2, n (%) |                 | 10 (7%)                         |
| HbA <sub>1c</sub> , %                      |                 | 5.7 ± 0.7                       |
| History of dyslipidemia, n (%)             |                 | 92 (58%)                        |
| Cholesterol, mmol/l                        |                 | 4.7 ± 1.2                       |
| Triglycerides, mmol/l                      |                 | 1.5 (1.0 to 2.0)                |
| High-density lipoprotein, mmol/l           |                 | 1.4 (1.0 to 1.6)                |
| Low-density lipoprotein, mmol/L            |                 | 2.6 (1.9 to 3.2)                |

Data are n (%), median (interquartile range), or mean ± SD as appropriate. BMI, body mass index.

**Table E2.** Medication of the final TAA cohort at baseline (n=230).

| <b>Drugs</b>                                  | <b>Baseline, all participants<br/>(n=230)</b> | <b>Baseline, complete cases<br/>(n=160)</b> | <b>Absolute changes during follow-up</b> | <b>Follow-up 3 yrs, complete cases<br/>(n=160)</b> |
|-----------------------------------------------|-----------------------------------------------|---------------------------------------------|------------------------------------------|----------------------------------------------------|
| $\beta$ -Adrenoreceptor antagonists           | 120 (52.2%)                                   | 82 (51.2%)                                  | +4 / -2                                  | 84 (52.5%)                                         |
| $\alpha$ -Adrenoreceptor antagonists          | 16 (7.0%)                                     | 8 (5.0%)                                    | +0 / -0                                  | 8 (5.0%)                                           |
| Angiotensin-converting-enzyme inhibitors      | 78 (33.9%)                                    | 59 (36.9%)                                  | +4 / -1                                  | 62 (38.8%)                                         |
| Calcium channel antagonists                   | 56 (24.3%)                                    | 38 (23.7%)                                  | +5 / -1                                  | 42 (26.3%)                                         |
| Angiotensin-II-receptor blockers              | 59 (25.7%)                                    | 36 (22.5%)                                  | +2 / -1                                  | 37 (23.1%)                                         |
| Aldosterone antagonists                       | 9 (3.9%)                                      | 6 (3.8%)                                    | +0 / -0                                  | 6 (3.8%)                                           |
| Diuretics                                     | 74 (32.2%)                                    | 45 (28.1%)                                  | +2 / -1                                  | 46 (28.8%)                                         |
| Statins                                       | 129 (56.1%)                                   | 94 (58.8%)                                  | +5 / -1                                  | 98 (61.3%)                                         |
| Insulin                                       | 4 (1.7%)                                      | 3 (1.9%)                                    | +3 / -0                                  | 6 (3.8%)                                           |
| Oral antidiabetics                            | 16 (7.0%)                                     | 11 (6.9%)                                   | +4 / -0                                  | 15 (9.4%)                                          |
| Oral anticoagulation                          | 78 (33.9%)                                    | 58 (36.2%)                                  | +5 / -1                                  | 62 (38.8%)                                         |
| Aspirin                                       | 88 (38.3%)                                    | 64 (40.0%)                                  | +0 / -0                                  | 64 (40.0%)                                         |
| <b>Total number of antihypertensive drugs</b> |                                               |                                             |                                          |                                                    |
| 0 antihypertensive drugs                      | 37 (16.1%)                                    | 26 (16.3%)                                  | +0 / -2                                  | 24 (15.0%)                                         |
| 1 antihypertensive drug                       | 64 (27.8%)                                    | 48 (30.0%)                                  | +1 / -3                                  | 46 (28.8%)                                         |
| 2 antihypertensive drugs                      | 64 (27.8%)                                    | 45 (28.1%)                                  | +4 / -2                                  | 46 (28.8%)                                         |
| 3 antihypertensive drugs                      | 43 (18.7%)                                    | 28 (17.5%)                                  | +4 / -3                                  | 29 (18.1%)                                         |
| 4 antihypertensive drugs                      | 19 (8.3%)                                     | 13 (8.1%)                                   | +4 / -2                                  | 15 (9.4%)                                          |
| 5 antihypertensive drugs                      | 3 (1.3%)                                      | 0 (0%)                                      | +0 / -0                                  | 0 (0%)                                             |

All data are n (%)

**Table E3.** Average TAA growth rates and blood pressure data by changes in overall number of antihypertensive drugs.

|                                               | <b>Less</b><br>antihypertensive<br>drugs at the end<br>of follow-up | <b>No change of</b><br>antihypertensive<br>drugs at the end<br>of follow-up | <b>More</b><br>antihypertensive<br>drugs at the end<br>of follow-up | ANOVA<br>p-value |
|-----------------------------------------------|---------------------------------------------------------------------|-----------------------------------------------------------------------------|---------------------------------------------------------------------|------------------|
| n                                             | 2                                                                   | 146                                                                         | 12                                                                  |                  |
| Aortic sinus growth<br>rate, mm               | 0.00 ± 0.05                                                         | 0.54 ± 1.26                                                                 | 0.50 ± 1.98                                                         | 0.259            |
| Ascending aorta<br>growth rate, mm            | 1.00 ± 0.9                                                          | 0.59 ± 1.13                                                                 | 0.68 ± 1.20                                                         | 0.586            |
| Systolic blood<br>pressure (office),<br>mmHg  | 126.0 (121.0 to<br>131.0)                                           | 129.2<br>(119.3 to 144.3)                                                   | 130.5<br>(120.0 to 136.0)                                           | 0.682            |
| Diastolic blood<br>pressure (office),<br>mmHg | 80.0 (75.0 to 85.0)                                                 | 81.5 (74.9 to 89.3)                                                         | 81.3 (76.3 to 88.3)                                                 | 0.568            |

**Figure E1.** Absolute aortic sinus and ascending aorta measurements over three years of complete cases (n=160).

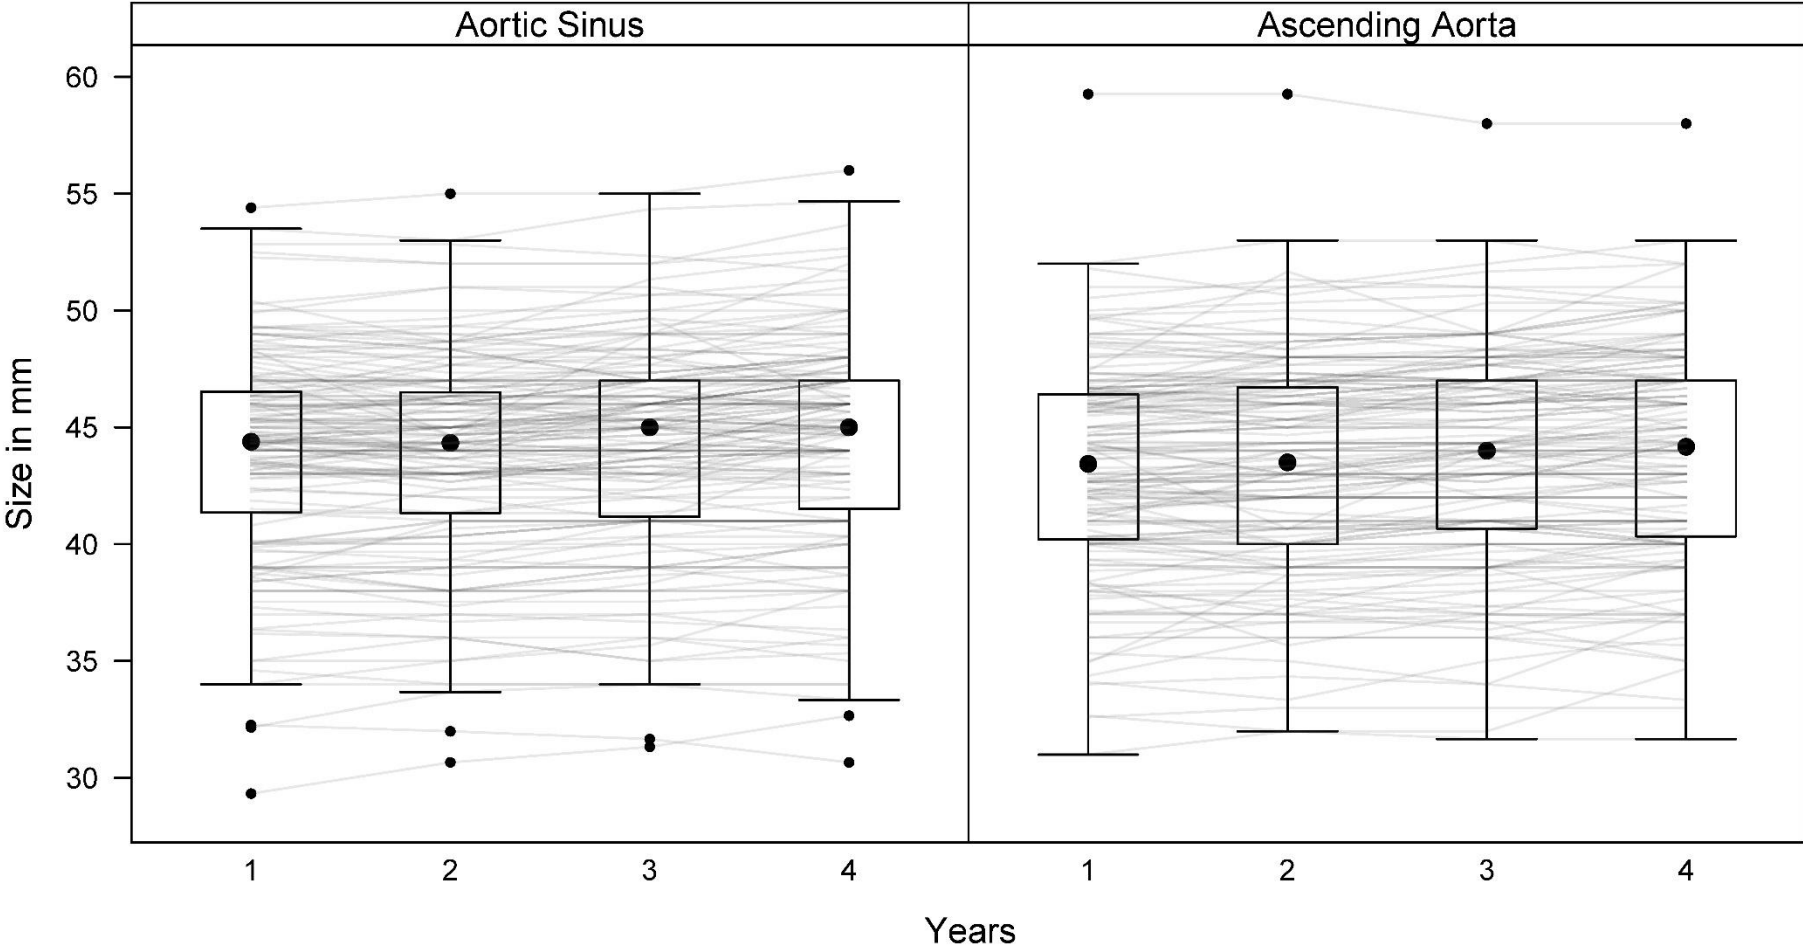

**Table E4.** Normal linear regression model based on TAA expansion as the primary outcome (n=160) and controlling for baseline value and pre-defined cardiovascular confounders. Model 1 ( $\beta_{1 \text{ AHI}}$ ) was conducted according to the study protocol. Model 2-4 ( $\beta_{1 \text{ ODI}}$  /  $\beta_{1 \text{ T90a}}$  /  $\beta_{1 \text{ T90r}}$ ) are post-hoc analysis exploring potential association of alternative severity parameters of OSA. Model 5 ( $\beta_{1 \text{ AHI}}$ ) limited the analysis to subjects who did not effectively initiate CPAP-therapy during the course of the study.

|                                                                                                         |                          |                                                          | Aortic sinus |                 |              | Ascending aorta |                 |              |
|---------------------------------------------------------------------------------------------------------|--------------------------|----------------------------------------------------------|--------------|-----------------|--------------|-----------------|-----------------|--------------|
|                                                                                                         |                          |                                                          | Coefficient  | 95% CI          | p-value      | Coefficient     | 95% CI          | p-value      |
| <b>Model 1 (n=160)</b><br>$\beta_0 + \beta_{1 \text{ AHI}} + \beta_{2-8}$                               | $\beta_0$                | Intercept                                                | 0.547        | -2.663 to 3.757 | 0.74         | -0.812          | -3.901 to 2.278 | 0.60         |
|                                                                                                         | $\beta_{1 \text{ AHI}}$  | Apnea-hypopnea index, hr <sup>-1</sup>                   | 0.025        | 0.009 to 0.040  | <b>0.002</b> | 0.026           | 0.011 to 0.041  | <b>0.001</b> |
|                                                                                                         | $\beta_2$                | Age, years                                               | -0.001       | -0.022 to 0.021 | 0.97         | 0.001           | -0.019 to 0.022 | 0.91         |
|                                                                                                         | $\beta_3$                | Male (Reference level: female)                           | 0.604        | -0.060 to 1.268 | 0.074        | 0.208           | -0.430 to 0.847 | 0.52         |
|                                                                                                         | $\beta_4$                | Body surface area, m <sup>2</sup>                        | -0.706       | -2.380 to 0.968 | 0.41         | 0.331           | -1.280 to 1.943 | 0.68         |
|                                                                                                         | $\beta_5$                | n of antihypertensives (0 to 5), n                       | 0.036        | -0.141 to 0.213 | 0.69         | -0.003          | -0.173 to 0.167 | 0.97         |
|                                                                                                         | $\beta_6$                | BMI, kg/m <sup>2</sup>                                   | 0.010        | -0.053 to 0.072 | 0.76         | -0.005          | -0.066 to 0.055 | 0.86         |
|                                                                                                         | $\beta_7$                | History of dyslipidemia (yes/no)                         | 0.076        | -0.094 to 0.246 | 0.38         | 0.071           | -0.092 to 0.235 | 0.39         |
|                                                                                                         | $\beta_8$                | Active smoker (yes/no)                                   | -0.162       | -0.767 to 0.442 | 0.60         | -0.016          | -0.598 to 0.566 | 0.96         |
| <b>Alternative OSA severity parameters (substitution of <math>\beta_1</math>)</b>                       |                          |                                                          |              |                 |              |                 |                 |              |
| <b>Model 2 (n=160)</b><br>$\beta_0 + \beta_{1 \text{ ODI}} + \beta_{2-8}$                               | $\beta_{1 \text{ ODI}}$  | Oxygen-desaturation index, hr <sup>-1</sup>              | 0.023        | 0.008 to 0.038  | <b>0.001</b> | 0.019           | 0.004 to 0.034  | <b>0.002</b> |
| <b>Model 3 (n=160)</b><br>$\beta_0 + \beta_{1 \text{ T90a}} + \beta_{2-8}$                              | $\beta_{1 \text{ T90a}}$ | Absolute time SpO <sub>2</sub> <90%, minutes             | -0.001       | -0.003 to 0.006 | 0.563        | 0.001           | -0.003 to 0.006 | 0.910        |
| <b>Model 4 (n=160)</b><br>$\beta_0 + \beta_{1 \text{ T90r}} + \beta_{2-8}$                              | $\beta_{1 \text{ T90r}}$ | Relative time SpO <sub>2</sub> <90%, % of recording time | -0.001       | -0.213 to 0.191 | 0.917        | -0.010          | -0.330 to 0.824 | 0.276        |
| <b>Limitation to subjects who did not effectively initiate CPAP during the trial (restriction of n)</b> |                          |                                                          |              |                 |              |                 |                 |              |
| <b>Model 5 (n=146)</b><br>$\beta_0 + \beta_{1 \text{ AHI}} + \beta_{2-8}$                               | $\beta_{1 \text{ AHI}}$  | Apnea-hypopnea index, hr <sup>-1</sup>                   | 0.029        | 0.012 to 0.049  | <b>0.005</b> | 0.028           | 0.009 to 0.050  | <b>0.004</b> |

**Bold** values denote statistical significance at the p<0.05 level. Model 1: R<sup>2</sup>=0.127. BMI, body mass index; CI, confidence interval  
Akaike's information criterion (AIC): Model 1 (-212.9) < Model 2 (-212.1) < Model 4 (-206.2) < Model 3 (-205.6) < Model 5 (-203.6)

**Table E5.** Average growth rates by AHI categories above and below 15 events per hour.

|                     | AHI <15<br>events/hour | AHI ≥15<br>events/hour | p-value |
|---------------------|------------------------|------------------------|---------|
| n                   | 105                    | 55                     |         |
| Aortic sinus, mm    | 0.35 ± 1.05            | 0.95 ± 1.49            | 0.005   |
| Ascending aorta, mm | 0.44 ± 1.19            | 0.90 ± 1.23            | 0.016   |

## Quality control

**Table E6.** Aortic sinus and ascending aorta dimensions measured by the same observer and corresponding absolute and relative measures of intraobserver variability cumulatively 1,920 measurements (160 subjects x 4 visits x 3 measurements).

|                          | Absolute intraobserver variability |                  |                    | Relative intraobserver variability |                 |        |
|--------------------------|------------------------------------|------------------|--------------------|------------------------------------|-----------------|--------|
|                          | Absolute difference (mm)*          | Difference (mm)* | Individual SD (mm) | Absolute difference (%)*           | Difference (%)* | SD (%) |
| Aortic Sinus, average    | 0.62                               | +0.01            | 0.34               | 1.43                               | +0.20           | 0.79   |
| Ascending aorta, average | 0.57                               | -0.01            | 0.32               | 1.34                               | -0.21           | 0.74   |

\* for the difference the two most extreme values (minimum, maximum) were considered

**Table E7.** Intraclass correlation coefficient using one-way ANOVA from 1,920 measurements at the aortic sinus (160 subjects x 4 visits x 3 measurements).

| Source of variation | Sum of squares | Degr. of freedom | Mean squares | p-value | ICC (95%CI)            |
|---------------------|----------------|------------------|--------------|---------|------------------------|
| Subjects            | 37,263.5       | 639              | 58.3         | <0.001  | 0.982<br>(0.980-0.984) |
| Error               | 463.2          | 1,280            | 0.4          | -       |                        |
| Total               | 37,726.7       | 1,919            | 19.7         | -       |                        |

95% CI, Confidence interval; ICC, Intraclass correlation coefficient



**Table E8.** Intraclass correlation coefficient using one-way ANOVA from 1,920 measurements at the ascending aorta (160 subjects x 4 visits x 3 measurements).

| Source of variation | Sum of squares | Degr. of freedom | Mean squares | p-value | ICC (95%CI)              |
|---------------------|----------------|------------------|--------------|---------|--------------------------|
| Subjects            | 38,915.1       | 639              | 60.4         | <0.001  | 0.987<br>(0.985 – 0.989) |
| Error               | 334.9          | 1,280            | 0.3          | -       |                          |
| Total               | 38,915.1       | 1,919            | 20.3         | -       |                          |

95% CI, Confidence interval; ICC, Intraclass correlation coefficient

**Table E9.** Average aortic sinus and ascending aorta growth rates measured by three different observers in 480 growth rate calculations (160 subjects x 3 annual growth rates).

|                     | Observer 1  | Observer 2  | Observer 3 | p-value (global) |
|---------------------|-------------|-------------|------------|------------------|
| Measurements, n (%) | 288 (60.0%) | 180 (37.5%) | 12 (2.5%)  | -                |
| Aortic sinus        | 0.17±0.88   | 0.21±0.84   | 0.29±1.02  | 0.743            |
| Ascending aorta     | 0.22±0.98   | 0.25±0.83   | 0.18±0.96  | 0.160            |
